## RESEARCH ARTICLE

# Hypoxia tolerance in elasmobranchs. I. Critical oxygen tension as a measure of blood oxygen transport during hypoxia exposure

Ben Speers-Roesch<sup>1,\*</sup>, Jeffrey G. Richards<sup>1</sup>, Colin J. Brauner<sup>1</sup>, Anthony P. Farrell<sup>1,2</sup>, Anthony J. R. Hickey<sup>3</sup>, Yuxiang S. Wang<sup>4</sup> and Gillian M. C. Renshaw<sup>5</sup>

<sup>1</sup>Department of Zoology, University of British Columbia, Vancouver, British Columbia, Canada, V6T 1Z4, <sup>2</sup>Faculty of Land and Food Systems, University of British Columbia, Vancouver, British Columbia, Canada, V6T 1Z4, <sup>3</sup>School of Biological Sciences, University of Auckland, Auckland 1142, New Zealand, <sup>4</sup>Department of Biology, Queen's University, Kingston, Ontario, Canada, K7L 3N6 and <sup>5</sup>School of Physiotherapy and Exercise Science, Griffith University, Gold Coast Campus, Southport, QLD 4222, Australia

\*Author for correspondence (bensr@zoology.ubc.ca)

Accepted 26 September 2011

### SUMMARY

The critical O<sub>2</sub> tension of whole-animal O<sub>2</sub> consumption rate ( $\dot{M}_{O_2}$ ), or  $P_{crit}$ , is the water P<sub>O<sub>2</sub></sub> ( $P_{wO_2}$ ) at which an animal transitions from an oxyregulator to an oxyconformer. Although  $P_{crit}$  is a popular measure of hypoxia tolerance in fishes because it reflects the capacity for O<sub>2</sub> uptake from the environment at low  $P_{wO_2}$ , little is known about the interrelationships between  $P_{crit}$  and blood O<sub>2</sub> transport characteristics and increased use of anaerobic metabolism during hypoxia exposure in fishes, especially elasmobranchs. We addressed this knowledge gap using progressive hypoxia exposures of two elasmobranch species with differing hypoxia tolerance. The  $P_{crit}$  of the hypoxia-tolerant epaulette shark (*Hemiscyllium ocellatum*, 5.10±0.37 kPa) was significantly lower than that of the comparatively hypoxia-sensitive shovelnose ray (*Aptychotrema rostrata*, 7.23±0.40 kPa). Plasma [lactate] was elevated above normoxic values at around  $P_{crit}$  in epaulette sharks, but increased relative to normoxic values at  $P_{wO_2}$  below  $P_{crit}$  in shovelnose rays, providing equivocal support for the hypothesis that  $P_{crit}$  is associated with increased anaerobic metabolism. The  $\dot{M}_{O_2}$ , arterial P<sub>O<sub>2</sub></sub> and arterial blood O<sub>2</sub> content (Ca<sub>O<sub>2</sub></sub>) were similar between the two species under normoxia and decreased in both species with progressive hypoxia, but as  $P_{wO_2}$  declined, epaulette sharks had a consistently higher  $\dot{M}_{O_2}$  and Ca<sub>O<sub>2</sub></sub> than shovelnose rays, probably due to their significantly greater *in vivo* haemoglobin (Hb)–O<sub>2</sub> binding affinity (*in vivo* Hb–O<sub>2</sub> P<sub>50</sub>=4.27±0.57 kPa for epaulette sharks vs 6.35±0.34 kPa for shovelnose rays). However, at  $P_{wO_2}$  values representing the same percentage of each species'  $P_{crit}$  (up to ~175% of  $P_{crit}$ ), Hb–O<sub>2</sub> saturation and Ca<sub>O<sub>2</sub></sub> were similar between species. These data support the hypothesis that Hb–O<sub>2</sub> P<sub>50</sub> is an important determinant of  $P_{crit}$  and suggest that  $P_{crit}$  can predict Hb–O<sub>2</sub> saturation and Ca<sub>O<sub>2</sub></sub> during hypoxia exposure, with a lower  $P_{crit}$  being associated with greater O<sub>2</sub> supply at a given  $P_{wO_2}$  and consequently better hypoxia tolerance. Thus,  $P_{crit}$  is a valuable predictor of environmental hypoxia tolerance and hypoxia exposures standardized at a given percentage of  $P_{crit}$  will yield comparable levels of arterial hypoxaemia, facilitating cross-species comparisons of responses to hypoxia.

Key words: respiration, metabolic rate, haemoglobin,  $P_{crit}$ , P<sub>50</sub>, haematology, pH, CO<sub>2</sub>, energy metabolism, fish.

### INTRODUCTION

Environmental hypoxia is a common abiotic stressor affecting the survival and distribution of aquatic species, but its occurrence varies in magnitude and spatio-temporal scale depending on habitat (Diaz and Breitburg, 2009). Consequently, many species of fish have evolved the ability to survive periods of low O<sub>2</sub> exposure but the severity and duration of hypoxia that can be tolerated is highly species specific. Identification of the physiological responses contributing to hypoxia tolerance among fishes is an area of major research interest. The increasing occurrence worldwide of environmental hypoxia due to anthropogenic activities, in particular, has led to the desire for simple physiologic metrics of hypoxia tolerance in fishes and other aquatic organisms. Even so, relatively few comparative studies exist on this topic in fishes.

One simple metric that holds promise in this regard is the critical O<sub>2</sub> tension of whole-animal O<sub>2</sub> consumption rate ( $\dot{M}_{O_2}$ ), or  $P_{crit}$ , which is the water P<sub>O<sub>2</sub></sub> ( $P_{wO_2}$ ) at which the  $\dot{M}_{O_2}$  of an organism

transitions from oxyregulation to oxyconformation.  $P_{crit}$  is thought to reflect the ability of an organism to extract O<sub>2</sub> from the environment to maintain routine  $\dot{M}_{O_2}$  as  $P_{wO_2}$  decreases, with a low  $P_{crit}$  being associated with greater hypoxia tolerance presumably because of improved O<sub>2</sub> uptake and transport to tissues at low  $P_{wO_2}$ . Consequently,  $P_{crit}$  has been employed routinely as an important measure of hypoxia tolerance in aquatic organisms including fishes (Chapman et al., 2002; Mandic et al., 2009; Nilsson and Östlund-Nilsson, 2008; Pörtner and Grieshaber, 1993; Routley et al., 2002). Physiological modifications at any step in the respiratory cascade may affect  $P_{crit}$ , including changes in ventilation, gill surface area, blood O<sub>2</sub> capacity (including blood haemoglobin concentration [Hb] and Hb–O<sub>2</sub> binding affinity), circulation of O<sub>2</sub> (e.g. cardiac output), diffusion into tissues and mitochondrial O<sub>2</sub> turnover (Dejours, 1981; Farrell and Richards, 2009). Whole-blood Hb–O<sub>2</sub> P<sub>50</sub> (i.e. Hb–O<sub>2</sub> binding affinity), in particular, has received attention as a determinant of  $P_{crit}$  as well as hypoxia tolerance in fishes because

of its important role in controlling blood  $O_2$  content and  $O_2$  uptake (Brauner and Wang, 1997). A phylogenetically independent comparison of  $O_2$  transport in sculpins showed that  $P_{crit}$  is strongly correlated with  $Hb-O_2 P_{50}$ ; species possessing a low  $P_{crit}$  typically also have a low  $Hb-O_2 P_{50}$  (Mandic et al., 2009). Other fishes known to have a high  $Hb-O_2$  binding affinity typically also have a low  $P_{crit}$  and are often hypoxia tolerant (Burggren, 1982; Jensen and Weber, 1982; Sollid et al., 2005). Overall, however, the relationship between  $P_{crit}$  and  $Hb-O_2 P_{50}$  has rarely been directly investigated and it remains incompletely defined. Also, it has not been unequivocally demonstrated that a low  $P_{crit}$  is associated with greater arterial blood  $O_2$  transport during hypoxia exposure in fishes. In fact, little is known in fishes about the responses of blood gas transport at and around  $P_{crit}$ .

At  $P_{W_{O_2}}$  below  $P_{crit}$ ,  $O_2$ -independent energy production (e.g. anaerobic glycolysis) is increasingly relied upon to meet energy demands at a time when aerobic metabolism is constrained. Measurements of  $P_{crit}$  and anaerobic end-product accumulation in certain animals provide evidence for the hypothesis that the increased activation of anaerobic metabolism coincides with  $P_{crit}$  (Pörtner and Grieshaber, 1993), although support from other studies is equivocal (McKenzie et al., 2000; Nonnotte et al., 1993). The link between  $P_{crit}$  and increased activation of anaerobic metabolism is thus uncertain, especially in fishes. Also, there are no direct comparisons of the onset of lactate accumulation in hypoxia-tolerant and -sensitive fishes that differ in  $P_{crit}$ .

In the present study, we investigated the relationship between  $P_{crit}$  and arterial  $O_2$  transport properties, including *in vivo*  $Hb-O_2 P_{50}$  and arterial total  $O_2$  content ( $Ca_{O_2}$ ), during progressive hypoxia exposure in two tropical elasmobranch species with similar lifestyles and activity levels, the epaulette shark, *Hemiscyllium ocellatum* (Bonnaterre), and the eastern shovelnose ray, *Aptychotrema rostrata* (Shaw). Epaulette sharks inhabit shallow coral reef environments where nocturnal hypoxia occurs commonly and they can tolerate hours of severe hypoxia (<1.0 kPa) exposure and up to 45 min of anoxia exposure (Renshaw et al., 2002; Routley et al., 2002). In contrast, eastern shovelnose rays are found in generally well-oxygenated coastal sandy and muddy benthic habitats in eastern Australia, including our sampling site of Moreton Bay, where hypoxic events are rare and dissolved  $O_2$  is usually close to air saturation at all depths (Dennison et al., 2004; Gabric et al., 1998; Kyne and Bennett, 2002). Indeed, preliminary observations from the present study showed that shovelnose rays are relatively hypoxia sensitive, succumbing rapidly if held at or below a  $P_{W_{O_2}}$  of 2.0 kPa for more than approximately 30 min. We predicted that the more hypoxia-tolerant epaulette shark would have a lower  $P_{crit}$  than the shovelnose ray and that the lower  $P_{crit}$  in the epaulette shark would be associated with a lower  $Hb-O_2 P_{50}$  and a correspondingly greater  $Ca_{O_2}$  at similar hypoxic  $P_{W_{O_2}}$ . Furthermore, we predicted that at each species'  $P_{crit}$  or at the same percentage of  $P_{crit}$ ,  $Hb-O_2$  saturation and  $Ca_{O_2}$  would be similar between the species despite being exposed to different  $P_{W_{O_2}}$  values. Finally, we measured arterial blood metabolic status including pH, [lactate] and  $CO_2$  status in order to further characterize the physiological correlates of  $P_{crit}$  in fishes and test the hypothesis that  $P_{crit}$  is associated with increased activation of anaerobic metabolism. Overall, the present study provides a comprehensive picture of the physiological responses associated with  $P_{crit}$  in two fishes, elucidating for the first time the relationship between  $P_{crit}$  and arterial blood  $O_2$  transport characteristics during hypoxia exposure, and providing comparative insight into the respiratory and metabolic attributes associated with hypoxia tolerance in fishes.

## MATERIALS AND METHODS

### Animals

Epaulette sharks and shovelnose rays of mixed sexes were supplied by Cairns Marine (Cairns, QLD, Australia) or Seafish Aquarium Life (Dunwich, QLD, Australia), respectively. The animals were collected under A1 level commercial harvest licences granted by the Department of Primary Industries, Australia. Epaulette sharks were caught on the Great Barrier Reef and transported in flow-through seawater tanks to holding tanks at Cairns Marine, where they were kept for 2 days without feeding before being transported by air and automobile to Moreton Bay Research Station, North Stradbroke Island, QLD, Australia. Shovelnose rays were caught in Moreton Bay, transferred to the mainland in flow-through seawater tanks, and transported to Moreton Bay Research Station by automobile. All fish were held in a recirculating seawater system (28°C) for at least 5 days before experimentation. Animals were fed every other day and fasted for at least 24 h before experimentation. All experiments were conducted according to guidelines set out by the Canadian Council for Animal Care and protocols approved by the University of British Columbia Animal Care Committee and the Griffith University Animal Ethics Committee.

### Experimental and analytical protocols

#### Surgical protocol

Epaulette sharks (1.29±0.04 kg,  $N=7$ ) and shovelnose rays (1.54±0.06 kg,  $N=8$ ) were netted from the holding tanks and anaesthetized in water containing a final concentration of 0.1 g l<sup>-1</sup> benzocaine (initially dissolved in 95% ethanol; 0.001% ethanol in anaesthetic bath). Fish were then moved to a surgery table where the gills were continuously irrigated with aerated seawater (28°C) containing 0.075 g l<sup>-1</sup> benzocaine.

To permit periodic sampling of blood, a PE50 (Clay-Adams, Parsippany, NJ, USA) cannula was fitted in the caudal artery *via* a lateral incision in the caudal peduncle, as described previously (De Boeck et al., 2001). The cannula was filled with heparinized (50 U ml<sup>-1</sup>) elasmobranch saline (in mmol l<sup>-1</sup>: 257 NaCl, 7 Na<sub>2</sub>SO<sub>4</sub>, 6 NaHCO<sub>3</sub>, 0.1 Na<sub>2</sub>HPO<sub>4</sub>, 4 KCl, 3 MgSO<sub>4</sub>·H<sub>2</sub>O, 2 CaCl<sub>2</sub>·2H<sub>2</sub>O, 300 urea and 100 trimethylamine oxide). The cannula was exteriorized through a PE160 grommet and sutured to the skin. The incision was closed with silk sutures. The fish were also fitted with ventral aorta flow probes as described in the accompanying paper (Speers-Roesch et al., 2012).

#### Experimental protocol

Following surgery, the instrumented fish was immediately moved to a cylindrical acrylic respirometer (18.2 l for epaulette sharks and 28.4 l for shovelnose rays) that was submersed inside an opaque aquarium that received seawater from the same recirculating system used for the fish holding tanks (28°C). A submersible pump inside the aquarium provided a continuous flow of water to the respirometer that ensured complete water mixing inside the respirometer and maintained  $P_{W_{O_2}}$ . The respirometer was covered with black plastic to prevent visual disturbance of the fish. The cannula and the flow probe lead from the fish were exteriorized through a hole in the respirometer fitted with a soft rubber stopper modified with a slit. The fish was allowed to recover from surgery and habituate to the respirometer for at least 12 h before any experimental procedures were performed.

Stable baseline conditions were confirmed by monitoring routine cardiovascular variables (see Speers-Roesch et al., 2012) for 1–2 h at a normoxic  $P_{W_{O_2}}$  of between 15 and 16 kPa (74–78% air saturation; 100% air saturation=20.4 kPa=153 Torr). An aortic blood

sample (1 ml) was taken at the end of this period for immediate measurement of normoxic resting levels of arterial whole-blood pH,  $P_{O_2}$ , [Hb], haematocrit (Hct) and total  $O_2$  content as described below. Plasma was separated by centrifugation (5000 g, 5 min), frozen in liquid nitrogen within 5 min of sampling, transported to Canada in a dry shipper and kept frozen at  $-80^\circ\text{C}$  for several weeks until analyses of metabolites and [total  $\text{CO}_2$ ] (see below). The red blood cell pellet was re-suspended in elasmobranch saline to a final volume of 1 ml and this was injected *via* the cannula to replace the blood removed. The respirometer was then closed by connecting the inflow and outflow tubes of the respirometer *via* a submersible pump that re-circulated the water inside the respirometer. The fish was allowed to consume  $O_2$  in the respirometer and the rate of depletion of  $P_{W_{O_2}}$  was used to calculate  $\dot{M}_{O_2}$  as described below. The changes in water parameters (e.g. pH,  $P_{\text{CO}_2}$ ) potentially associated with the use of closed respirometry have been shown previously to have no effect on  $P_{crit}$  in fish (Henriksson et al., 2008). Indeed, only modest increases in arterial  $P_{\text{CO}_2}$  ( $P_{a\text{CO}_2}$ ) were observed in the present study (see Results and Discussion). Arterial blood samples were taken and treated as described above at regular intervals including  $P_{W_{O_2}}$  at approximately 11.8, 7.7, 5.8, 3.8 and 2.0 kPa in both species, as well as approximately 1.0 and 0.1 kPa in epaulette sharks (see Table 1). Fish were held in the closed respirometer until  $P_{W_{O_2}}$  reached  $\sim 0.1$  kPa for epaulette sharks and  $\sim 1.6$  kPa for the shovelnose rays, which took  $135 \pm 8$  and  $71 \pm 6$  min, respectively, from the point at which the normoxic blood sample was taken and the respirometer was closed. These nadirs of  $P_{W_{O_2}}$  were chosen based on previous studies on epaulette sharks (e.g. Renshaw et al., 2002) and preliminary observations of hypoxia-exposed animals, which clearly revealed that epaulette sharks tolerated prolonged bouts of severe hypoxia whereas shovelnose rays showed distress or loss of equilibrium if held at or below 2.0 kPa for more than 30 min. The rate of  $O_2$  depletion was similar between species (see Table 1). Once

the nadir in  $P_{W_{O_2}}$  ( $\sim 0.1$  or  $\sim 1.6$  kPa) was reached, normoxic water was reintroduced to the respirometer. A final blood sample was taken at 60 min of recovery in normoxic water and analysed as previously described. In some cases, cannulae were damaged by the movements of the fish during the overnight acclimation period or during the experimental exposure and therefore sample sizes of measured parameters vary slightly (see figure captions for final  $N$  values). At the end of the trials the fishes were terminally anaesthetized in seawater containing benzocaine.

#### Data acquisition and calculation of oxygen consumption rate and $P_{crit}$

$P_{W_{O_2}}$  in the respirometer was measured using an Oxyguard probe (Mark IV, Point Four Systems, Richmond, BC, Canada), modified to give a  $\pm 1$  V output signal, that was placed in a custom-made Plexiglas<sup>®</sup> chamber connected in line with the circulation pump. The probe output was fed to a Power Lab unit (ADInstruments, Castle Hill, NSW, Australia) and subsequently analysed using LabChart Pro software (v. 6.0; ADInstruments).

Whole-animal  $\dot{M}_{O_2}$  during the respirometry trials was calculated from the rate of decline in  $P_{W_{O_2}}$  over 10 min periods bracketing  $P_{W_{O_2}}$  at regular intervals from approximately 14.8 to 0.67 kPa in epaulette sharks and approximately 13.7 to 1.9 kPa in shovelnose rays, following the methods of Henriksson et al. (Henriksson et al., 2008). Blanks without fish were run for both chambers and background  $\dot{M}_{O_2}$  was subtracted from fish  $\dot{M}_{O_2}$ . The corrected  $\dot{M}_{O_2}$  was plotted against  $P_{W_{O_2}}$  and the inflection point at which  $\dot{M}_{O_2}$  transitions from being independent to being dependent on  $P_{W_{O_2}}$  (i.e.  $P_{crit}$ ) was calculated using the BASIC program designed by Yeager and Ultsch (Yeager and Ultsch, 1989). At  $P_{W_{O_2}}$  above  $P_{crit}$ ,  $\dot{M}_{O_2}$  values were constant and not significantly different from one another within a species, therefore confirming that  $\dot{M}_{O_2}$  is independent of  $P_{W_{O_2}}$  above  $P_{crit}$ . The  $\dot{M}_{O_2}$  was not measured at the

Table 1. Arterial Hct, [Hb], MCHC, plasma [glucose], plasma [ $\beta$ -HB], [ $\text{HCO}_3^-$ ],  $P_{\text{CO}_2}$  and [total  $\text{CO}_2$ ] of epaulette sharks and shovelnose rays exposed to progressive decreases in  $P_{W_{O_2}}$ , and after a subsequent 60 min of recovery in normoxic water

|                 | Sample   | Time (min)     | $P_{W_{O_2}}$ (kPa) | Hct (%)                   | [Hb] (mmol $^{-1}$ )       | MCHC ([Hb]/Hct) | [Glucose] (mmol $^{-1}$ ) | [ $\beta$ -HB] (mmol $^{-1}$ ) | [ $\text{HCO}_3^-$ ] (mmol $^{-1}$ ) | $P_{a\text{CO}_2}$ (kPa)   | [Total $\text{CO}_2$ ] (mmol $^{-1}$ ) |
|-----------------|----------|----------------|---------------------|---------------------------|----------------------------|-----------------|---------------------------|--------------------------------|--------------------------------------|----------------------------|----------------------------------------|
| Epaulette shark | 1        | 0              | 16.01 $\pm$ 0.43    | 13.4 $\pm$ 0.7            | 0.45 $\pm$ 0.02            | 3.39 $\pm$ 0.15 | 1.51 $\pm$ 0.18           | 0.69 $\pm$ 0.21                | 4.04 $\pm$ 0.58                      | 0.18 $\pm$ 0.02            | 4.09 $\pm$ 0.59                        |
|                 | 2        | 13.3 $\pm$ 2.0 | 11.80 $\pm$ 0.06    | 13.9 $\pm$ 0.7            | 0.50 $\pm$ 0.02            | 3.60 $\pm$ 0.17 | 1.47 $\pm$ 0.14           | 0.49 $\pm$ 0.11                | 4.15 $\pm$ 0.35                      | 0.19 $\pm$ 0.01            | 4.19 $\pm$ 0.35                        |
|                 | 3        | 27.7 $\pm$ 2.7 | 7.65 $\pm$ 0.10     | 13.4 $\pm$ 1.0            | 0.49 $\pm$ 0.04            | 3.64 $\pm$ 0.11 | 1.43 $\pm$ 0.12           | 0.50 $\pm$ 0.13                | 4.45 $\pm$ 0.24                      | 0.21 $\pm$ 0.01            | 4.51 $\pm$ 0.24                        |
|                 | 4        | 35.7 $\pm$ 3.4 | 5.73 $\pm$ 0.02     | 13.9 $\pm$ 1.0            | 0.52 $\pm$ 0.04            | 3.71 $\pm$ 0.13 | 1.39 $\pm$ 0.12           | 0.46 $\pm$ 0.13                | 4.45 $\pm$ 0.24                      | 0.24 $\pm$ 0.02*           | 4.51 $\pm$ 0.25                        |
|                 | 5        | 43.4 $\pm$ 3.4 | 3.81 $\pm$ 0.12     | 12.7 $\pm$ 1.3            | 0.49 $\pm$ 0.03            | 3.90 $\pm$ 0.13 | 1.32 $\pm$ 0.10           | 0.49 $\pm$ 0.14                | 4.03 $\pm$ 0.25                      | 0.26 $\pm$ 0.02*           | 4.10 $\pm$ 0.25                        |
|                 | 6        | 57.4 $\pm$ 3.4 | 1.85 $\pm$ 0.03     | 13.4 $\pm$ 1.0            | 0.48 $\pm$ 0.04            | 3.62 $\pm$ 0.12 | 1.60 $\pm$ 0.15           | 0.44 $\pm$ 0.11                | 3.86 $\pm$ 0.49                      | 0.31 $\pm$ 0.04*           | 3.94 $\pm$ 0.50                        |
|                 | 7        | 66.8 $\pm$ 2.8 | 1.00 $\pm$ 0.02     | 14.0 $\pm$ 1.6            | 0.51 $\pm$ 0.06            | 3.67 $\pm$ 0.27 | 1.42 $\pm$ 0.18           | 0.36 $\pm$ 0.09                | 3.64 $\pm$ 0.57                      | 0.36 $\pm$ 0.03*           | 3.74 $\pm$ 0.58                        |
|                 | 8        | 130 $\pm$ 9    | 0.11 $\pm$ 0.03     | 13.4 $\pm$ 1.5            | 0.42 $\pm$ 0.06            | 3.13 $\pm$ 0.17 | 1.05 $\pm$ 0.19           | 0.53 $\pm$ 0.17                | 2.65 $\pm$ 0.46                      | 0.97 $\pm$ 0.11*           | 2.91 $\pm$ 0.48                        |
|                 | Recovery | 195 $\pm$ 7    | 14.07 $\pm$ 1.08    | 16.2 $\pm$ 0.9*           | 0.55 $\pm$ 0.04            | 3.37 $\pm$ 0.20 | 1.31 $\pm$ 0.25           | 0.51 $\pm$ 0.36                | 2.18 $\pm$ 0.53*                     | 0.42 $\pm$ 0.11*           | 2.30 $\pm$ 0.56*                       |
| Shovelnose ray  | 1        | 0              | 15.34 $\pm$ 0.42    | 12.2 $\pm$ 0.7            | 0.46 $\pm$ 0.04            | 3.76 $\pm$ 0.23 | 1.19 $\pm$ 0.08           | 0.23 $\pm$ 0.14                | 4.56 $\pm$ 0.31                      | 0.25 $\pm$ 0.02 $^\dagger$ | 4.64 $\pm$ 0.32                        |
|                 | 2        | 9.0 $\pm$ 1.2  | 11.86 $\pm$ 0.46    | 12.2 $\pm$ 1.0            | 0.44 $\pm$ 0.04            | 3.64 $\pm$ 0.17 | 1.32 $\pm$ 0.12           | 0.70 $\pm$ 0.33                | 4.44 $\pm$ 0.43                      | 0.24 $\pm$ 0.03            | 4.51 $\pm$ 0.44                        |
|                 | 3        | 24.3 $\pm$ 2.3 | 7.88 $\pm$ 0.07     | 11.9 $\pm$ 0.5            | 0.44 $\pm$ 0.03            | 3.75 $\pm$ 0.21 | 1.26 $\pm$ 0.10           | 0.41 $\pm$ 0.25                | 4.29 $\pm$ 0.26                      | 0.23 $\pm$ 0.02            | 4.21 $\pm$ 0.26                        |
|                 | 4        | 32.9 $\pm$ 2.8 | 5.83 $\pm$ 0.09     | 11.1 $\pm$ 0.5 $^\dagger$ | 0.42 $\pm$ 0.04 $^\dagger$ | 3.74 $\pm$ 0.30 | 1.30 $\pm$ 0.09           | 0.40 $\pm$ 0.27                | 4.35 $\pm$ 0.38                      | 0.26 $\pm$ 0.03            | 4.42 $\pm$ 0.39                        |
|                 | 5        | 44.2 $\pm$ 3.6 | 3.82 $\pm$ 0.07     | 10.5 $\pm$ 0.4            | 0.39 $\pm$ 0.03 $^\dagger$ | 3.72 $\pm$ 0.20 | 1.36 $\pm$ 0.10           | 0.41 $\pm$ 0.24                | 4.08 $\pm$ 0.36                      | 0.29 $\pm$ 0.03            | 4.17 $\pm$ 0.36                        |
|                 | 6        | 63.4 $\pm$ 5.8 | 2.07 $\pm$ 0.03     | 10.2 $\pm$ 0.5 $^\dagger$ | 0.39 $\pm$ 0.04 $^\dagger$ | 3.82 $\pm$ 0.33 | 1.38 $\pm$ 0.17           | 0.29 $\pm$ 0.17                | 3.52 $\pm$ 0.41                      | 0.39 $\pm$ 0.05*           | 3.63 $\pm$ 0.41                        |
|                 | Recovery | 131 $\pm$ 6    | 14.28 $\pm$ 0.42    | 10.5 $\pm$ 0.6 $^\dagger$ | 0.41 $\pm$ 0.05            | 3.87 $\pm$ 0.21 | 1.52 $\pm$ 0.09           | 0.43 $\pm$ 0.17                | 3.84 $\pm$ 0.60 $^\dagger$           | 0.56 $\pm$ 0.24*           | 4.12 $\pm$ 0.47 $^\dagger$             |

Data are means  $\pm$  s.e.m. ( $N=4-6$  for epaulette sharks except for recovery where  $N=3$ ;  $N=5-6$  for shovelnose rays). Total water  $P_{O_2}$  range of exposures:  $\sim 16.0$  kPa and 15.3 kPa (normoxia) to  $\sim 0.1$  kPa and 1.6 kPa, in epaulette sharks and shovelnose rays, respectively; total duration of exposure from initial blood sample 1 and closing of respirometer to  $P_{W_{O_2}}$  nadir: 135 $\pm$ 8 min and 71 $\pm$ 6 min; respectively; see Materials and methods for further details.

$P_{W_{O_2}}$ , water  $P_{O_2}$ ; Hct, haematocrit; Hb, haemoglobin; MCHC, mean cellular haemoglobin content;  $\beta$ -HB,  $\beta$ -hydroxybutyrate;  $P_{a\text{CO}_2}$ , arterial  $P_{\text{CO}_2}$ .

\*Value is significantly different from the resting value (sample 1) within species (samples 2–6 for both species: two-way ANOVA with Holm–Sidak test; sample 7–8 for epaulette sharks: one-way ANOVA with Holm–Sidak test; recovery values for both species: two-way ANOVA with Holm–Sidak test;  $P<0.05$ );

$^\dagger$ shovelnose ray value is significantly different from that of the epaulette shark at the same sample point, for samples 1–6 or recovery (two-way ANOVAs with Holm–Sidak tests,  $P<0.05$ ). Time and  $P_{W_{O_2}}$  were excluded from statistical analyses.

initial normoxic  $P_{wO_2}$  (~15.3–16.0 kPa) or the normoxic recovery period because of the flow-through conditions.

#### Analytical protocols

Blood [Hb] was measured spectrophotometrically (Blaxhall and Daisley, 1973). Hct was determined following centrifugation at 5000g in a sealed capillary tube. Mean cellular Hb content (MCHC) was calculated as ([Hb]/Hct)100. Arterial blood  $P_{O_2}$  ( $P_{aO_2}$ ) was measured with a Radiometer  $P_{O_2}$  (E-5046) electrode, thermostatically controlled in a D616 cell at 28°C, in conjunction with a PHM 71 acid–base analyser (Radiometer, Copenhagen, Denmark). Whole-blood  $Ca_{O_2}$  was measured following the method of Tucker (Tucker, 1967). In order to calculate the percentage  $O_2$  saturation of Hb in arterial blood, the quantity of  $O_2$  bound to Hb was calculated by subtracting physically dissolved  $O_2$  in the blood [calculated from measured  $P_{aO_2}$  and published blood  $O_2$  solubility coefficients (Christiforides and Hedley-Whyte, 1969)] from the  $Ca_{O_2}$  measured in whole blood. The quantity of  $O_2$  bound to Hb was then expressed as a percentage of the theoretical maximum quantity of  $O_2$  bound to Hb, which was calculated using measured [Hb] values and assuming four  $O_2$  bound per Hb tetramer at 100% saturation. *In vivo* blood  $P_{50}$  and Hill coefficient values were then calculated from Hill plots based on data for arterial  $P_{O_2}$  and Hb– $O_2$  saturation.

Blood pH was measured using a Radiometer pH micro-electrode thermostatically held at 28°C and displayed on a Radiometer PHM 71 acid–base analyser. True plasma [total  $CO_2$ ] was measured according to Cameron (Cameron, 1971), immediately following thawing of the plasma on ice. To confirm that freezing of plasma and storage at –80°C has no effect on [total  $CO_2$ ], we compared [total  $CO_2$ ] measured in freshly sampled plasma from normocarbic, normoxic tilapia (*Oreochromis hybrid* sp.) with an aliquot of the same plasma that was frozen in liquid nitrogen and stored at –80°C for 4 weeks. [Total  $CO_2$ ] was  $7.1 \pm 0.7 \text{ mmol l}^{-1}$  in the fresh samples vs  $7.0 \pm 0.8 \text{ mmol l}^{-1}$  in the frozen samples ( $N=6$ ; paired *t*-test,  $P>0.05$ ; B.S.-R., unpublished); thus, freeze–thaw of plasma does not appear to affect [total  $CO_2$ ]. We have seen similar results in hagfish (*Eptatretus stoutii*) (D. W. Baker and C.J.B., unpublished).  $P_{aCO_2}$  and  $[HCO_3^-]$  were calculated from measured values of pH and [total  $CO_2$ ] through manipulation of the Henderson–Hasselbalch equation (Brauner et al., 2000) with appropriate constants for elasmobranchs (Boutilier et al., 1984). Plasma [lactate] and [glucose] were measured on deproteinized and untreated plasma, respectively, according to the protocols outlined by Bergmeyer (Bergmeyer, 1983). Plasma [ $\beta$ -hydroxybutyrate] ( $[\beta\text{-HB}]$ ) was measured on deproteinized plasma following the protocol of McMurray et al. (McMurray et al., 1984).

#### Statistics

The effects of species and  $P_{wO_2}$  on blood gas, acid–base and metabolite parameters were tested for samples 1–6 (at overlapping  $P_{wO_2}$  between species; see Table 1) using a two-way ANOVA followed by Holm–Sidak *post hoc* (H–S) tests against species or the normoxic resting values measured at  $\geq 15.3 \text{ kPa}$  ( $P_{wO_2}$  values were not statistically different between species at each sample point, allowing this two-way design; Student's *t*-test,  $P>0.05$ ). Samples 7 and 8 in epaulette sharks (see Table 1) were tested separately for significance against the normoxic resting sample 1 (16.0 kPa) using a one-way ANOVA with H–S tests. Species differences in the *in vivo* blood  $P_{50}$  and Hill coefficient ( $n_H$ ) values were examined using a Student's *t*-test and the effect of  $O_2$  on Hb– $O_2$  saturation was compared within species using a one-way ANOVA with H–S tests (comparisons between species were not made because arterial  $P_{O_2}$

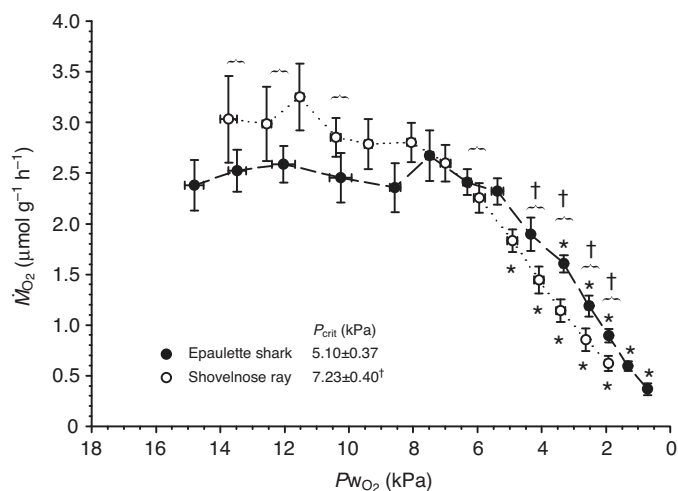

Fig. 1. Oxygen consumption rate ( $\dot{M}_{O_2}$ ) and critical  $O_2$  tension ( $P_{crit}$ ) values of epaulette sharks and shovelnose rays exposed to progressive decreases in water  $P_{O_2}$  ( $P_{wO_2}$ ). See Table 1 and Materials and methods for further information on time course and starting and ending  $P_{wO_2}$  of the exposures. Data are means  $\pm$  s.e.m. ( $N=7$  for epaulette sharks;  $N=8$  for shovelnose rays). \*Statistically significant difference from the first normoxic resting value within species. †Statistically significant difference between species for  $P_{crit}$ , and statistically significant difference between the epaulette shark value and the shovelnose ray value bracketed by a horizontal brace (where the two species values were taken at statistically similar  $P_{wO_2}$ ); the absence of a dagger indicates that the two bracketed species values are not statistically different from each other. See Materials and methods for details on statistical methods.

at sample points were not always comparable). The relationship between Hb– $O_2$  saturation and  $P_{crit}$  was examined *via* linear regression analysis of Hb– $O_2$  saturation against  $P_{wO_2}$  expressed as the percentage of  $P_{crit}$  (using values from individual animals). This analysis was carried out up to a Hb– $O_2$  saturation of ~75% because at higher values Hb saturation curves are asymptotic. Recovery values were compared between species and with the normoxic resting values at  $\geq 15.3 \text{ kPa}$  within species using a two-way ANOVA with H–S test.

The critical  $P_{wO_2}$  of  $\dot{M}_{O_2}$  were compared between species using a Student's *t*-test. The effects of species and  $P_{wO_2}$  on  $\dot{M}_{O_2}$  were tested using a two-way ANOVA with H–S tests using data from eight sampling points of overlapping  $P_{wO_2}$  at approximately 13.6, 12.3, 10.3, 6.1, 4.2, 3.4, 2.5 and 1.9 kPa and the points of statistical comparison are denoted by horizontal braces on the figures. Overlapping  $P_{wO_2}$  values were not statistically different between species (Student's *t*-test,  $P>0.05$ ). Data from other sampling points were omitted from these analyses. However, in order to fully assess the effect of  $P_{wO_2}$  on  $\dot{M}_{O_2}$  in each species, one-way ANOVA were run across all sampling points within each species, with H–S comparisons against the first normoxic resting value. The effect of  $P_{wO_2}$  on measured parameters was found to be similar for both two-way and one-way ANOVA designs.

Statistical significance was accepted when  $P<0.05$  and analyses were carried out using SigmaStat 3.0 or GraphPad Prism 5.0. Data were log or square-root transformed prior to statistical analyses if assumptions of equal variance or normality were not met. Repeated measures ANOVA could not be carried out because experimental constraints negated the use of data from the same animal at every single sample period. In any case, the standard ANOVA procedures utilized here result in a conservative statistical assessment of our data.

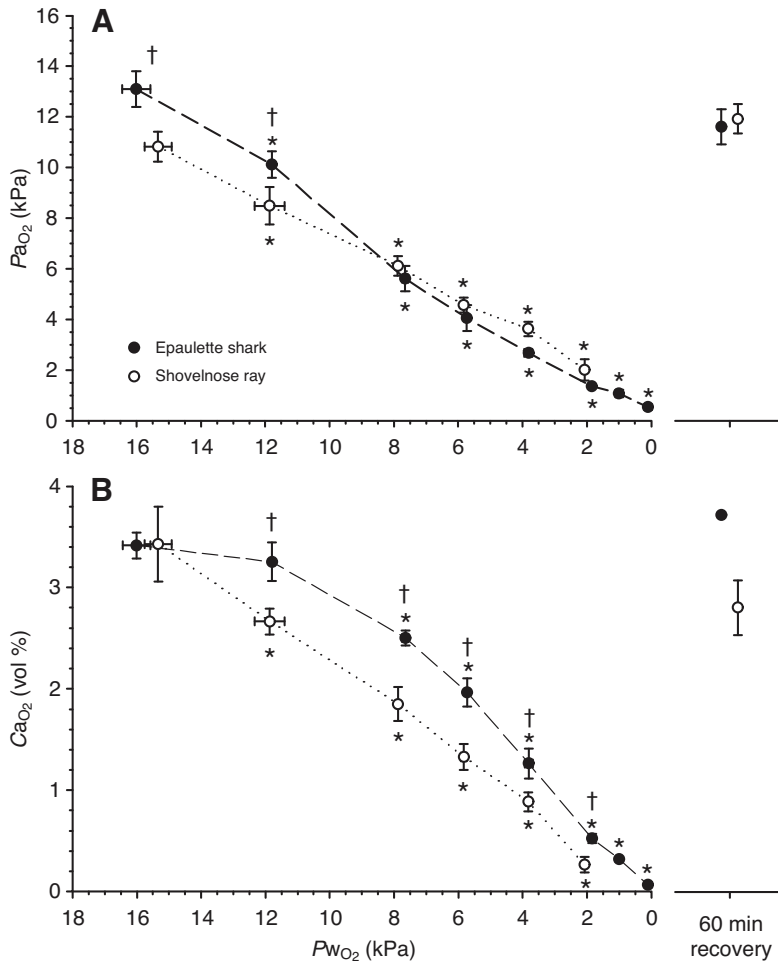

Fig. 2. Arterial  $P_{O_2}$  ( $P_{aO_2}$ ) (A) and arterial  $O_2$  content ( $C_{aO_2}$ ) (B) of epaulette sharks and shovelnose rays exposed to progressive decreases in  $P_{wO_2}$  and after a subsequent 60 min of recovery in normoxic water. See Table 1 and Materials and methods for further information on time course and starting and ending  $P_{wO_2}$  of the exposures. Data are means  $\pm$  s.e.m. ( $N=4-6$  for epaulette sharks except for recovery where  $N=3$ ;  $N=5-6$  for shovelnose rays). Recovery values are offset for clarity. \*Statistically significant difference from the first, normoxic resting value at  $\geq 15.3$  kPa within species. †Shovelnose ray value is significantly different from that of the epaulette shark at the same sample point. See Materials and methods for details on statistical methods. Recovery values were not significantly different between species or when compared with resting values in both species.

## RESULTS

Under normoxic conditions, individuals of both species were generally quiescent. As  $P_{wO_2}$  decreased, there was a modest and temporary increase in activity level associated with exploratory behaviour in some individuals of each species. As  $P_{wO_2}$  decreased further, the fishes again became quiescent. In a couple instances in each species, severe agitation occurred temporarily ( $<10$  s) at low  $P_{wO_2}$ , causing the cannula to be dislodged and negating further blood sampling.

A typical relationship between  $\dot{M}_{O_2}$  and  $P_{wO_2}$  was observed in both species, each with a zone of  $O_2$ -independent  $\dot{M}_{O_2}$  occurring at higher  $P_{wO_2}$  followed by a zone of  $O_2$  dependence below  $P_{crit}$ , where  $\dot{M}_{O_2}$  decreased with decreasing  $P_{wO_2}$  (Fig. 1). The  $P_{crit}$  was significantly lower in epaulette sharks than in shovelnose rays (Fig. 1). When  $P_{wO_2}$  was above  $\sim 5$  kPa,  $\dot{M}_{O_2}$  was similar between species. However, when  $P_{wO_2}$  was below  $\sim 5$  kPa,  $\dot{M}_{O_2}$  was consistently greater for epaulette sharks than for shovelnose rays at any similar  $P_{wO_2}$  (Fig. 1).

$P_{aO_2}$  decreased linearly with decreasing  $P_{wO_2}$  and was not different between species, except at the two highest  $P_{wO_2}$  where epaulette sharks had higher  $P_{aO_2}$  compared with shovelnose rays (Fig. 2A). Total  $C_{aO_2}$  decreased with decreasing  $P_{wO_2}$  with the exception of between  $16.01 \pm 0.43$  and  $11.80 \pm 0.06$  kPa in epaulette sharks. Total  $C_{aO_2}$  was the same in both species at the highest  $P_{wO_2}$ , but at all lower  $P_{wO_2}$  it was greater in epaulette sharks than in shovelnose rays (Fig. 2B). Recovery in normoxic water returned  $P_{aO_2}$  and  $C_{aO_2}$  to values similar to those measured at the beginning of the progressive hypoxia trial (Fig. 2). Hb- $O_2$  saturation decreased

as  $P_{aO_2}$  fell below approximately 9.0 and 6.0 kPa in shovelnose rays and epaulette sharks, respectively (Fig. 3). The *in vivo* Hb- $O_2$  binding affinity was significantly higher (lower  $P_{50}$ ) in epaulette sharks than in shovelnose rays (Fig. 3). The Hill coefficient was similar between species (Fig. 3). At each species'  $P_{50}$ , arterial pH was  $\sim 7.82$  in epaulette sharks and  $\sim 7.81$  in shovelnose rays, and  $P_{aCO_2}$  was  $\sim 0.23$  kPa in both species (extrapolated from pH and  $P_{aCO_2}$  data at the extrapolated  $P_{wO_2}$  at  $P_{50}$ ).

A significant linear relationship was found for each species when Hb- $O_2$  saturation was regressed against  $P_{wO_2}$  expressed as a percentage of  $P_{crit}$ , and because the slopes and y-intercepts of these regression lines were not significantly different between species, one line of best fit was applied to the pooled data for the two species (Fig. 4). Above  $\sim 175\%$  of  $P_{crit}$ , the Hb- $O_2$  saturation became asymptotic so these data were excluded from the linear regression. Thus, Hb- $O_2$  saturation was similar between species at  $P_{wO_2}$  values representing the same percentage of each species'  $P_{crit}$  (up to  $\sim 175\%$  of  $P_{crit}$ ). Because there were no major differences in [Hb] between species (see below), the same relationship existed for  $C_{aO_2}$  (data not shown). Overall, these data show that  $P_{crit}$  is predictive of Hb- $O_2$  saturation and  $C_{aO_2}$  at  $P_{wO_2}$  lower than about 175% of  $P_{crit}$ .

In both species progressive hypoxia had no effect on Hct, [Hb] or MCHC (Table 1). Hct and [Hb] were significantly higher in epaulette sharks at sampling points 4 ( $P_{wO_2} = 5.73 \pm 0.02$  kPa in epaulette sharks and  $5.83 \pm 0.09$  kPa in shovelnose rays) and 6 ( $P_{wO_2} = 1.85 \pm 0.03$  kPa in epaulette sharks and  $2.07 \pm 0.03$  kPa in shovelnose rays) and [Hb] was also higher at sampling point 5 ( $P_{wO_2} = 3.81 \pm 0.12$  kPa in epaulette sharks and  $3.82 \pm 0.07$  kPa in

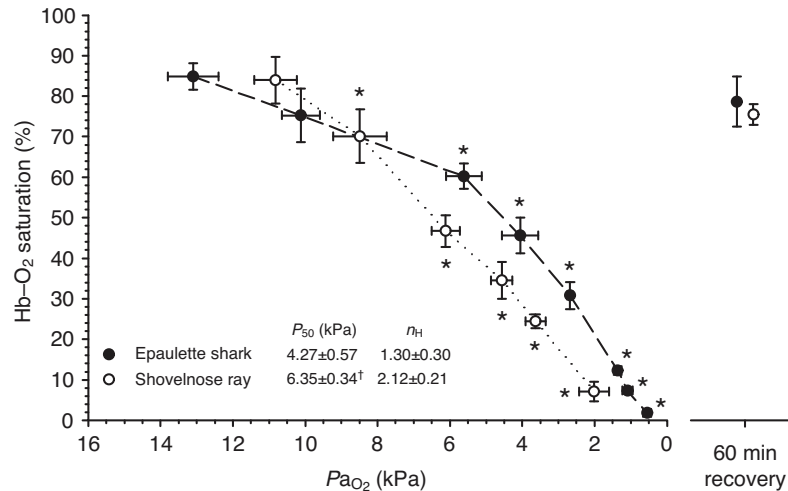

Fig. 3. Arterial haemoglobin–O<sub>2</sub> (Hb–O<sub>2</sub>) saturation as a function of arterial  $P_{O_2}$  ( $P_{aO_2}$ ) of epaulette sharks and shovelnose rays exposed to progressive decreases in  $P_{W_{O_2}}$  and after a subsequent 60 min of recovery in normoxic water. *In vivo* Hb–O<sub>2</sub>  $P_{50}$  values and Hill coefficients ( $n_H$ ) were calculated from Hill plots (see Materials and methods) and are presented in the figure. At each species'  $P_{50}$ , arterial pH was  $\sim 7.82$  in epaulette sharks and  $\sim 7.81$  in shovelnose rays, and  $P_{aCO_2}$  was  $\sim 0.23$  kPa in both species (extrapolated from pH and  $P_{aCO_2}$  data at the extrapolated  $P_{W_{O_2}}$  at  $P_{50}$ ). See Materials and methods for details on calculation of Hb–O<sub>2</sub> saturation. See Table 1 and Materials and methods for further information on time course and starting and ending  $P_{W_{O_2}}$  of the exposures. Data are means  $\pm$  s.e.m. ( $N=4-6$  for epaulette sharks except for recovery where  $N=3$ ;  $N=5-6$  for shovelnose rays). Recovery values are offset for clarity. \*Statistically significant difference from the first, normoxic resting value at  $\geq 15.3$  kPa within species.  $^\dagger$ Shovelnose ray value for Hb–O<sub>2</sub>  $P_{50}$  is significantly different from that of the epaulette shark. The Hill coefficients were not significantly different between species. See Materials and methods for details on statistical methods. Recovery values were not significantly different between species or when compared with resting values in both species.

shovelnose rays) (Table 1). Recovery [Hb] and MCHC were similar to normoxic resting values but Hct was higher in epaulette sharks during recovery (Fig. 2; Table 1).

Plasma [lactate] was low at  $P_{W_{O_2}}$  above 8 kPa, then significantly increased above normoxic resting levels by  $\sim 3.7$  kPa in both species and increased further with decreasing  $P_{W_{O_2}}$ . Plasma [lactate] remained elevated after 60 min recovery in normoxic water (Fig. 5A). Plasma [lactate] was generally similar between species at all  $P_{W_{O_2}}$  during progressive hypoxia but was greater in epaulette sharks during recovery (Fig. 5A). A significant decrease in blood pH first occurred at  $\sim 3.8$  kPa in both species, decreasing further with declining  $P_{W_{O_2}}$  and remaining low after 60 min recovery in normoxic water (Fig. 5B). Blood pH was similar between species but was significantly lower in the shovelnose rays at the final sampling point for this species at  $\sim 2.0$  kPa (Fig. 5B). Arterial [ $HCO_3^-$ ] and [total CO<sub>2</sub>] were unchanged during progressive hypoxia exposure in both species (Table 1). An increase in  $P_{aCO_2}$  occurred in both species and it remained after 60 min recovery in normoxic water (Table 1). In epaulette sharks only, normoxic recovery was associated with significantly lower [ $HCO_3^-$ ] and [total CO<sub>2</sub>] compared with normoxic resting levels as well as compared with the same parameters in shovelnose rays in recovery (Table 1). Plasma [glucose] or [ $\beta$ -HB] were similar between species and were unaffected by either progressive hypoxia or recovery in normoxic water (Table 1).

## DISCUSSION

The present study demonstrates a link between  $P_{crit}$  and arterial blood O<sub>2</sub> transport characteristics during hypoxia exposure in two elasmobranch species, adding significantly to a growing body of evidence showing that  $P_{crit}$  is an important indicator of hypoxia tolerance in fish (Chapman et al., 2002; Mandic et al., 2009; Nilsson and Östlund-Nilsson, 2008). We provide the first comparative evidence that a lower  $P_{crit}$  is associated with maintenance of greater  $Ca_{O_2}$  during hypoxia exposure, which benefits hypoxia tolerance.

Similarly, we show that  $P_{crit}$  is predictive of Hb–O<sub>2</sub> saturation and  $Ca_{O_2}$  (in the observed absence of changes in [Hb]) during hypoxia exposure (Fig. 4), supporting the notion that differences in Hb–O<sub>2</sub> binding affinity determine differences in  $P_{crit}$ . Indeed, the *in vivo* Hb–O<sub>2</sub>  $P_{50}$  of the epaulette shark was lower than that of the shovelnose ray and this is the likely explanation for the greater  $Ca_{O_2}$  observed in the former species at low  $P_{W_{O_2}}$ . The impressive hypoxia tolerance of the epaulette shark is probably attributable, in part, to its enhanced O<sub>2</sub> transport characteristics compared with those of the less tolerant shovelnose ray.

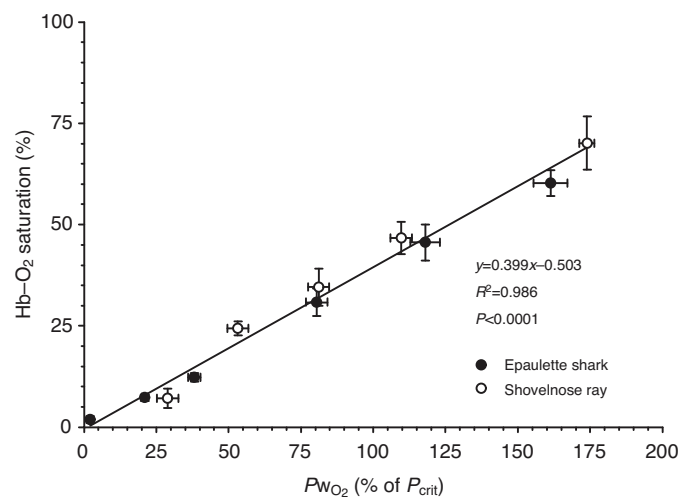

Fig. 4. Hb–O<sub>2</sub> saturation as a function of  $P_{W_{O_2}}$  represented as percentage of  $P_{crit}$  in epaulette sharks and shovelnose rays exposed to progressive decreases in  $P_{W_{O_2}}$  (i.e.  $P_{crit}$  of each species occurs at 100%). Data are means  $\pm$  s.e.m. ( $N=4-6$  for epaulette sharks;  $N=5-6$  for shovelnose rays). The linear regression is statistically significant ( $P < 0.0001$ , linear regression ANOVA).

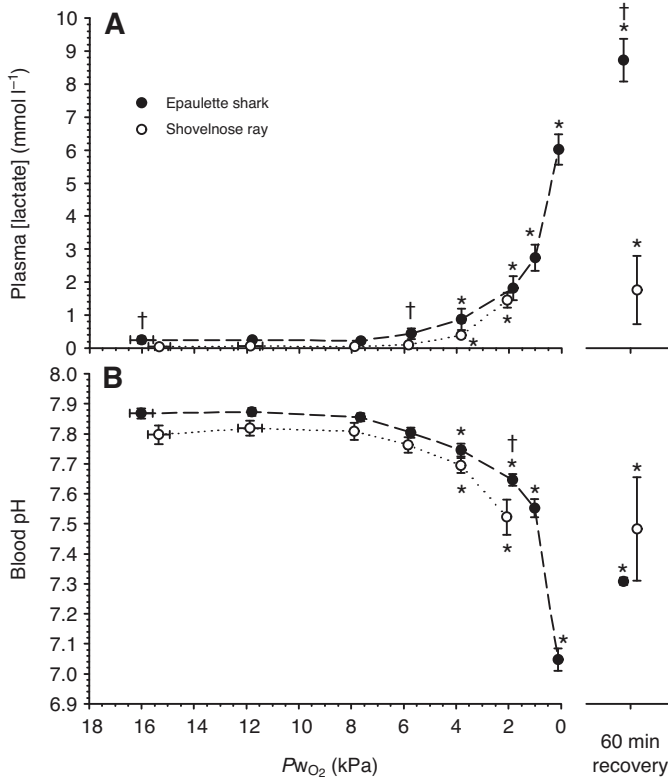

Fig. 5. Arterial plasma lactate (A) and arterial blood pH (B) of epaulette sharks and shovelnose rays exposed to progressive decreases in  $P_{W_{O_2}}$  and after a subsequent 60 min of recovery in normoxic water. See Table 1 and Materials and methods for further information on time course and starting and ending  $P_{W_{O_2}}$  of the exposures. Data are means  $\pm$  s.e.m. ( $N=4-6$  for epaulette sharks except for recovery where  $N=3$ ;  $N=5-6$  for shovelnose rays). Recovery values are offset for clarity. \*Statistically significant difference from the first, normoxic resting value at  $\geq 15.3$  kPa within species. †Shovelnose ray value is significantly different from that of the epaulette shark at the same sample point.

#### Oxygen uptake and blood oxygen transport properties

Under normoxic resting conditions (i.e.  $P_{W_{O_2}} > P_{crit}$ ) the  $\dot{M}_{O_2}$  of epaulette sharks matches closely with that measured for this species by Routley et al. (Routley et al., 2002). Epaulette sharks and shovelnose rays had similar resting  $\dot{M}_{O_2}$ , which fell within the range of temperature-corrected  $\dot{M}_{O_2}$  for elasmobranchs of a similar activity level ( $0.9-3.5 \mu\text{mol g}^{-1} \text{h}^{-1}$ ) (Butler and Metcalfe, 1988). In both species, exposure to progressive hypoxia caused a pronounced reduction of  $\dot{M}_{O_2}$  below  $P_{crit}$  (Fig. 1), similar to many teleosts (Mandic et al., 2009; Speers-Roesch et al., 2010) as well as at least one other elasmobranch, the spotted catshark (*Scyliorhinus canicula*) (Butler and Taylor, 1975). The  $P_{crit}$  for epaulette sharks (Fig. 1) matches the lower range of  $P_{crit}$  measured for this species by Routley et al. (Routley et al., 2002). The shovelnose ray had a significantly higher  $P_{crit}$  compared with the epaulette shark (Fig. 1), but it was lower than that of other previously studied elasmobranchs (see Routley et al., 2002). Although the level of  $O_2$  demand can affect  $P_{crit}$  (Thuy et al., 2010), this probably does not explain the observed difference in  $P_{crit}$  because  $\dot{M}_{O_2}$  under normoxic conditions was the same in each species (Fig. 1). The difference in  $P_{crit}$  between the hypoxia-tolerant epaulette shark and the comparatively hypoxia-sensitive shovelnose ray is consistent with the notion that a lower  $P_{crit}$  is associated with greater hypoxia tolerance in fish (Mandic et

al., 2009; Nilsson and Östlund-Nilsson, 2008). The  $P_{crit}$  of the epaulette shark is generally similar to those of hypoxia-tolerant teleosts and it is the lowest known  $P_{crit}$  among elasmobranchs (Routley et al., 2002; Speers-Roesch et al., 2010). The lower  $P_{crit}$  of epaulette sharks was associated not only with maintenance of routine  $\dot{M}_{O_2}$  to a lower  $P_{W_{O_2}}$  compared with shovelnose rays but also with maintenance of greater  $\dot{M}_{O_2}$  at all comparable hypoxic  $P_{W_{O_2}}$  (i.e. below  $P_{crit}$ ), where depression of  $\dot{M}_{O_2}$  occurred in both species (Fig. 1). Thus, a low  $P_{crit}$  allows a fish to maintain  $\dot{M}_{O_2}$  as high as possible during hypoxia exposure, minimizing reliance on inefficient anaerobic metabolism.

Haematological (i.e. Hct, [Hb], MCHC) and  $O_2$  transport properties (i.e.  $P_{a_{O_2}}$ ,  $Ca_{O_2}$  and Hb- $O_2$  saturation) in arterial blood of epaulette sharks and shovelnose rays under normoxic resting conditions (Figs 2 and 3, values at highest  $P_{W_{O_2}}$  or  $P_{a_{O_2}}$ ; Table 1, sample 1) were generally similar between species and the values were typical for elasmobranchs (e.g. Hct, 10–20%; [Hb],  $0.46-0.62 \text{ mmol l}^{-1}$ ; MCHC,  $\sim 3.3$ ;  $P_{a_{O_2}}$ , 8–15 kPa;  $Ca_{O_2}$ , 3–5 vol. %; Hb- $O_2$  saturation, 75–100%) (Butler and Metcalfe, 1988; Butler and Taylor, 1975; De Boeck et al., 2001; Lai et al., 1990; Perry and Gilmour, 1996; Routley et al., 2002). The lack of 100% Hb- $O_2$  saturation in normoxia is consistent with other studies on elasmobranchs (e.g. Lai et al., 1990) and the presence of up to 27% methaemoglobin in fishes has been put forward as an explanation as to why some fish haemoglobins are not saturated to their theoretical maximum *in vivo* (Graham and Fletcher, 1986). The *in vivo*  $P_{50}$  values for epaulette sharks and shovelnose rays are higher than previously measured in other elasmobranchs (1.9–2.7 kPa) (Butler and Taylor, 1975; Cooper and Morris, 2004; Lai et al., 1990), but in the previous studies these were measured at lower environmental temperatures compared with the present study and environmental temperature appears to be positively correlated with  $P_{50}$  in marine fishes (Wells, 2005). The Hill coefficients were similar between species and relatively low, which is typical of elasmobranchs (Butler and Metcalfe, 1988).

The changes in  $P_{a_{O_2}}$  and  $Ca_{O_2}$  during progressive hypoxia (Fig. 2) were similar to those seen in other elasmobranchs (Butler and Taylor, 1975; Perry and Gilmour, 1996; Routley et al., 2002). The roughly linear decrease in  $P_{a_{O_2}}$  was of similar magnitude in epaulette sharks and shovelnose rays, suggesting ventilatory responses to hypoxia are comparable between species (Fig. 2A). However, at all matched  $P_{W_{O_2}}$  below the normoxic resting level,  $Ca_{O_2}$  was greater in epaulette sharks than in shovelnose rays, which appears to be due to greater Hb- $O_2$  saturation resulting from the epaulette shark's higher *in vivo* Hb- $O_2$  binding affinity (i.e. lower  $P_{50}$ ) (Fig. 2B; Fig. 3). This result is consistent with findings suggesting that Hb- $O_2$   $P_{50}$  is an important component of hypoxia tolerance in fishes, with the most tolerant species possessing the lowest  $P_{50}$ , which result in greater blood  $O_2$  loading at low  $P_{W_{O_2}}$  (Jensen and Weber, 1982; Mandic et al., 2009; Perry and Reid, 1992).

Interestingly, the species differences in Hb- $O_2$  saturation and  $Ca_{O_2}$  disappeared when these parameters were plotted against  $P_{W_{O_2}}$  expressed as a percentage of  $P_{crit}$  (i.e. the relationships overlapped between species) (Fig. 4). Thus, when measured at a  $P_{W_{O_2}}$  of the same percentage of each species'  $P_{crit}$ , values of Hb- $O_2$  saturation or  $Ca_{O_2}$  (because changes in [Hb] were not apparent) were the same in epaulette sharks and shovelnose rays. These results suggest that  $P_{crit}$  is predictive of Hb- $O_2$  saturation and  $Ca_{O_2}$  during hypoxia exposure, with species with lower  $P_{crit}$  having a greater capacity for arterial blood  $O_2$  transport at similar hypoxic  $P_{W_{O_2}}$ . These results also suggest that the differences in arterial Hb- $O_2$  saturation between epaulette sharks and shovelnose rays may represent the basis of species differences in  $P_{crit}$ . This observation, as well as the

fact that at  $P_{crit}$  the  $Pa_{O_2}$  in both species was similar to their respective *in vivo* Hb- $O_2$   $P_{50}$  (Fig. 2A; Fig. 3), agrees with Mandic and colleagues' (Mandic et al., 2009) discovery of a close relationship between  $P_{crit}$  and Hb- $O_2$   $P_{50}$  in sculpins and supports the idea that  $P_{50}$  is an important determinant of  $P_{crit}$  in fishes.

The lack of a change in Hct or [Hb] during progressive hypoxia (Table 1) is consistent with previous studies on epaulette sharks and other elasmobranchs (Perry and Gilmour, 1996; Routley et al., 2002; Short et al., 1979) and thus adjustments of these parameters may have a minimal role in improving  $O_2$  transport in elasmobranchs exposed to hypoxia. Nonetheless, Hct and [Hb] were approximately 25% higher at some hypoxic  $P_{W_{O_2}}$  values in epaulette sharks compared with shovelnose rays (Table 1), probably contributing to the higher  $Ca_{O_2}$  seen in the former species. However, the difference of  $Ca_{O_2}$  between species was greater (40–100% higher in epaulette sharks) at these hypoxic  $P_{W_{O_2}}$ , affirming an important role for Hb- $O_2$   $P_{50}$  in enhancing  $O_2$  supply in the epaulette shark.

#### Metabolites and acid–base status

An increased reliance on anaerobic glycolysis and a consequent metabolic acidosis during hypoxia exposure was indicated by a large increase in plasma [lactate] and a decrease in blood pH at or below  $P_{crit}$  in both species (Fig. 5), similar to results observed in other hypoxia-exposed fishes (Routley et al., 2002; Scott et al., 2008). At the lowest  $P_{W_{O_2}}$  exposure of shovelnose rays, blood pH was significantly lower compared with epaulette sharks (Fig. 5B), suggesting that the latter species may possess more effective acid–base regulation or less reliance on anaerobic energy production, potentially due to a superior  $O_2$  supply. Nevertheless, at lower  $P_{W_{O_2}}$  epaulette shark blood pH dropped precipitously and like other hypoxia-tolerant vertebrates this species must be able to tolerate severe metabolic acidosis during hypoxia exposure (Driedzic and Gesser, 1994). The  $P_{W_{O_2}}$  at which epaulette sharks first showed a significant increase in plasma [lactate] was approximately the same as found previously for this species (Routley et al., 2002) and coincided with its  $P_{crit}$  (Fig. 5A). In shovelnose rays, however, the increase in plasma [lactate] did not coincide with its  $P_{crit}$  but rather occurred at a similar  $P_{W_{O_2}}$  to that of the epaulette sharks and accumulated at a similar rate (Fig. 5A). Although our data do not provide solid evidence for the hypothesis that  $P_{crit}$  correlates with increased activation of anaerobic metabolism in fishes (Pörtner and Grieshaber, 1993), they are consistent with this activation not occurring above  $P_{crit}$ . It is also possible that a non-equilibrium state during early progressive hypoxia exposure including interspecific differences in blood volume or lactate handling may have obscured our ability to detect the onset of an increase of anaerobic metabolism at  $P_{crit}$  in shovelnose rays. This may also explain why the rate of plasma lactate accumulation was similar between species despite lower blood  $O_2$  content in shovelnose rays. We consider the effect of changes in fish activity (see Results) on plasma [lactate] to be negligible because of the low measurement variability and the consistently low values at  $P_{W_{O_2}}$  above  $P_{crit}$  (Fig. 1). Also, most fish activity was moderate and in the few instances of excessive activity, cannula dislodgement meant that plasma [lactate] was no longer measured.

The metabolic acidosis seen in epaulette sharks and shovelnose rays during progressive hypoxia resulted in a downward trend in  $[HCO_3^-]$  and [total  $CO_2$ ] (Table 1). In both species  $Pa_{CO_2}$  increased, possibly due to a build-up of  $CO_2$  in the closed respirometer. This elevation in  $CO_2$  probably had no major effect on other measured parameters, because the magnitude of the  $Pa_{CO_2}$  increase was not large until the final sample point and no major differences were

observed between the final sample point and the previous sample point for any measured parameters. In any case, hypercarbia commonly accompanies environmental hypoxia so in this regard the present exposures are more ecologically relevant. The responses of blood  $CO_2$  parameters to progressive hypoxia in the present study differ from the respiratory alkaloses seen in hypoxic spiny dogfish (*Squalus acanthias*) (Perry and Gilmour, 1996) or spotted catshark (Butler et al., 1979), but these other studies utilized moderate rather than severe hypoxia that probably mitigated metabolic acidosis – Butler et al. (Butler et al., 1979) found no increase in plasma [lactate]. The relatively low normoxic resting levels of  $Pa_{CO_2}$ ,  $[HCO_3^-]$  and [total  $CO_2$ ] in epaulette sharks and shovelnose rays are typical of elasmobranchs (Butler and Metcalfe, 1988; De Boeck et al., 2001; Lai et al., 1990).

Plasma [glucose] was unaffected by progressive hypoxia (Table 1), which is unlike most teleosts but mirrors previous findings in hypoxia-exposed epaulette sharks and spiny dogfish (Routley et al., 2002; Speers-Roesch and Treberg, 2010). In some hypoxia-tolerant teleosts, large decreases in plasma [non-esterified fatty acid], an important aerobic fuel, occur during hypoxia exposure (Speers-Roesch et al., 2010). There was no similar response in epaulette sharks or shovelnose rays for plasma concentration of  $\beta$ -HB, which in elasmobranchs serves an important role as an alternative lipid-derived aerobic fuel (Speers-Roesch and Treberg, 2010).

#### Recovery from progressive hypoxia exposure

Epaulette sharks and shovelnose rays showed comparable recovery of respiratory parameters after progressive hypoxia and followed a trajectory similar to that of other fishes (Hughes and Johnston, 1978; Van Raaij et al., 1996). Following 60 min of recovery in normoxic water, normoxic arterial  $O_2$  parameters were restored in both species (Fig. 2B; Fig. 3); however, recovery from metabolic acidosis and high [lactate] was incomplete, particularly in epaulette sharks, which had experienced more severe hypoxia and hypoxia-induced acidosis and lactate accumulation (Fig. 5B). Arterial  $[HCO_3^-]$  in recovery remained lower than normoxic levels in epaulette sharks, probably as a consequence of the persistence of acidosis, whereas shovelnose rays had recovered (Table 1).

#### CONCLUSIONS

The present study on the hypoxia-tolerant epaulette shark and the hypoxia-sensitive shovelnose ray provides the first evidence that  $P_{crit}$  is predictive of arterial Hb- $O_2$  saturation and  $Ca_{O_2}$  during hypoxia exposure in fishes. At the same level of hypoxia, fishes with a low  $P_{crit}$  can maintain higher  $Ca_{O_2}$  than fishes with a higher  $P_{crit}$  and this appears to be due to the presence of a lower *in vivo* Hb- $O_2$   $P_{50}$  that allows greater Hb- $O_2$  saturation (Fig. 2B; Fig. 3). Additionally, at  $P_{W_{O_2}}$  of the same percentage of  $P_{crit}$ , Hb- $O_2$  saturation (and  $Ca_{O_2}$ ) is the same between species (Fig. 4). These results suggest that the interspecific differences in Hb- $O_2$  saturation may represent the basis of species differences in  $P_{crit}$ , providing strong support for the notion that Hb- $O_2$   $P_{50}$  is a major determinant of  $P_{crit}$  as well as hypoxia tolerance in fishes (Mandic et al., 2009).

Our finding of a link between  $P_{crit}$ , Hb- $O_2$  saturation and  $Ca_{O_2}$  provides a mechanistic explanation for the argument that  $P_{crit}$  is a good indicator of hypoxia tolerance in fishes. A low  $P_{crit}$  is associated with greater  $Ca_{O_2}$  and therefore improved  $O_2$  delivery to tissues during hypoxia exposure, which presumably enhances energy supply and reduces the accumulation of deleterious anaerobic end products, thus improving hypoxia tolerance. Importantly, our findings also show that hypoxia exposures that are standardized to



$P_{crit}$  will yield comparable levels of arterial hypoxaemia, facilitating cross-species comparative analyses. However, the results of the accompanying study (Speers-Roesch et al., 2012) warn that even when hypoxia exposures are scaled to  $P_{crit}$ , tissue-specific differences may occur in the metabolic response to the same amount of circulating  $O_2$ .

Although our measurements of plasma [lactate] showed no difference in the onset  $P_{W_{O_2}}$  or the rate of accumulation of lactate between species despite differing  $P_{crit}$ , our ability to detect such a difference may have been obscured by non-steady-state lactate dynamics during initial hypoxia exposure. Accumulation of lactate in each species did occur at or below  $P_{crit}$ , providing equivocal support for the hypothesis that  $P_{crit}$  is associated with increased activation of anaerobic metabolism (Pörtner and Grieshaber, 1993). Investigations of lactate turnover in hypoxia-exposed fish, including consideration of the potential effect of metabolic depression (which could blunt lactate accumulation), are needed to further test this hypothesis.

The superior  $O_2$  uptake and blood  $O_2$  capacity during hypoxia exposure in epaulette sharks probably explains in part the renowned hypoxia tolerance of this elasmobranch (Nilsson and Renshaw, 2004). Epaulette sharks also show enhanced hypoxic cardiovascular function compared with shovelnose rays (Speers-Roesch et al., 2012), which further improves  $O_2$  delivery to tissues. Maintenance rather than depression of  $O_2$  supply and aerobic metabolism at low levels of  $P_{W_{O_2}}$  may be an important component of hypoxia tolerance in fishes.

#### LIST OF SYMBOLS AND ABBREVIATIONS

|                    |                                                               |
|--------------------|---------------------------------------------------------------|
| $\beta$ -HB        | $\beta$ -hydroxybutyrate                                      |
| $Ca_{O_2}$         | arterial blood $O_2$ content                                  |
| Hb                 | haemoglobin                                                   |
| Hb- $O_2$ $P_{50}$ | haemoglobin- $O_2$ binding affinity                           |
| Hct                | haematocrit                                                   |
| MCHC               | mean cellular haemoglobin content                             |
| $M_{O_2}$          | whole-animal $O_2$ consumption rate                           |
| $n_H$              | Hill coefficient                                              |
| $P_{aCO_2}$        | arterial blood $P_{CO_2}$                                     |
| $P_{aO_2}$         | arterial blood $P_{O_2}$                                      |
| $P_{CO_2}$         | partial pressure of $CO_2$                                    |
| $P_{crit}$         | critical $O_2$ tension of whole-animal $O_2$ consumption rate |
| $P_{O_2}$          | partial pressure of $O_2$                                     |
| $P_{W_{O_2}}$      | water $P_{O_2}$                                               |

#### ACKNOWLEDGEMENTS

Kevin and Kathy Townsend and their staff at the Moreton Bay Research Station provided exemplary logistical and technical assistance. Craig Franklin kindly lent us equipment needed for a portion of this study. Miles Gray assisted with hypoxia exposures and sampling.

#### FUNDING

Funding was provided by the Discovery Grant Program from the Natural Sciences and Engineering Research Council of Canada (NSERC) [to J.G.R., C.J.B., A.P.F., and Y.X.W.]. Funding was also provided from Sea World Research and Rescue Foundation [to G.M.C.R.]. A.J.R.H. was supported by the University of Auckland Early Career Research Excellence award. C.J.B. was supported by a Killam Faculty Research Fellowship. B.S.-R. was supported by a Pacific Century Graduate Scholarship from the University of British Columbia and the Province of British Columbia, a War Memorial Scholarship from IODE Canada, a *Journal of Experimental Biology* Travelling Fellowship from the Company of Biologists, a Comparative Physiology and Biochemistry Student Research Grant from the Canadian Society of Zoologists, and a Graduate Travel Award from the Department of Zoology, University of British Columbia.

#### REFERENCES

Bergmeyer, H. U. (1983). *Methods of Enzymatic Analysis*. New York: Academic Press.

Blaxhall, P. C. and Daisley, K. W. (1973). Routine haematological methods for use with fish blood. *J. Fish Biol.* **5**, 771-781.

Boutilier, R. G., Heming, T. A. and Iwama, G. K. (1984). Physicochemical parameters for use in fish respiratory physiology. In *Fish Physiology*, Vol. 10A (ed. W. S. Hoar and D. J. Randall), pp. 403-430. London: Academic Press.

Brauner, C. J. and Wang, T. (1997). The optimal oxygen equilibrium curve: a comparison between environmental hypoxia and anemia. *Amer. Zool.* **37**, 101-108.

Brauner, C. J., Thorarensen, H., Gallagher, P., Farrell, A. P. and Randall, D. J. (2000).  $CO_2$  transport and excretion in rainbow trout (*Oncorhynchus mykiss*) during graded sustained exercise. *Respir. Physiol.* **119**, 69-82.

Burggren, W. W. (1982). 'Air gulping' improves blood oxygen transport during aquatic hypoxia in the goldfish *Carassius auratus*. *Physiol. Zool.* **55**, 327-334.

Butler, P. J. and Metcalfe, J. D. (1988). Cardiovascular and respiratory systems. In *Physiology of Elasmobranch Fishes* (ed. T. J. Shuttleworth), pp. 1-47. Berlin: Springer-Verlag.

Butler, P. J. and Taylor, E. W. (1975). The effect of progressive hypoxia on respiration in the dogfish (*Scyliorhinus canicula*) at different seasonal temperatures. *J. Exp. Biol.* **63**, 117-130.

Butler, P. J., Taylor, E. W. and Davison, W. (1979). The effect of long term, moderate hypoxia on acid-base balance, plasma catecholamines and possible anaerobic end products in the unrestrained dogfish *Scyliorhinus canicula*. *J. Comp. Physiol.* **132**, 297-303.

Cameron, J. N. (1971). A rapid method for determination of total carbon dioxide in small blood samples. *J. Appl. Physiol.* **31**, 632-634.

Chapman, L. J., Chapman, C. A., Nordlie, F. G. and Rosenberger, A. E. (2002). Physiological refugia: swamps, hypoxia tolerance and maintenance of fish diversity in the Lake Victoria region. *Comp. Biochem. Physiol.* **133A**, 421-437.

Christoforides, C. and Hedley-Whyte, J. (1969). Effect of temperature and hemoglobin concentration on solubility of  $O_2$  in blood. *J. Appl. Physiol.* **27**, 592-596.

Cooper, A. R. and Morris, S. (2004). Haemoglobin function and respiratory status of the Port Jackson shark, *Heterodontus portusjacksoni*, in response to lowered salinity. *J. Comp. Physiol.* **B 174**, 223-236.

De Boeck, G., Grosell, M. and Wood, C. (2001). Sensitivity of the spiny dogfish (*Squalus acanthias*) to waterborne silver exposure. *Aquat. Toxicol.* **54**, 261-275.

Dejours, P. (1981). *Principles of Comparative Respiratory Physiology*. Amsterdam: Elsevier/North Holland.

Dennison, W. C., Carruthers, T. J. B., Thomas, J. E. and Glibert, P. M. (2004). A comparison of issues and management approaches in Moreton Bay, Australia and Chesapeake Bay, USA. In *Wetlands Ecosystems in Asia: Function and Management* (ed. M. H. Wong), pp. 3-25. Amsterdam: Elsevier.

Diaz, R. J. and Breitbart, D. L. (2009). The hypoxic environment. In *Hypoxia, Fish Physiology*, Vol. 27 (ed. J. G. Richards, A. P. Farrell and C. J. Brauner), pp. 1-23. San Diego: Elsevier Academic Press.

Driedzic, W. R. and Gesser, H. (1994). Energy metabolism and contractility in ectothermic vertebrate hearts: hypoxia, acidosis, and low temperature. *Physiol. Rev.* **74**, 221-258.

Farrell, A. P. and Richards, J. G. (2009). An integrative synthesis of the responses of fish to hypoxia. In *Hypoxia, Fish Physiology*, Vol. 27 (ed. J. G. Richards, A. P. Farrell and C. J. Brauner), pp. 448-503. San Diego: Elsevier Academic Press.

Gabric, A. J., McEwan, J. and Bell, P. R. F. (1998). Water quality and phytoplankton dynamics in Moreton Bay, south-eastern Queensland. I. Field survey and satellite data. *Mar. Freshwater Res.* **49**, 215-225.

Graham, M. S. and Fletcher, G. L. (1986). High concentrations of methemoglobin in five species of temperate marine teleosts. *J. Exp. Zool.* **239**, 139-142.

Henriksson, P., Mandic, M. and Richards, J. G. (2008). The osmo-respiratory compromise in sculpins: impaired gas exchange is associated with freshwater tolerance. *Physiol. Biochem. Zool.* **81**, 310-319.

Hughes, G. M. and Johnston, I. A. (1978). Some responses of the electric ray (*Torpedo marmorata*) to low ambient oxygen tensions. *J. Exp. Biol.* **73**, 107-117.

Jensen, F. B. and Weber, R. E. (1982). Respiratory properties of tench blood and hemoglobin. Adaptation to hypoxic-hypercapnic water. *Mol. Physiol.* **2**, 235-250.

Kyne, P. M. and Bennett, M. B. (2002). Diet of the eastern shovelnose ray, *Aptychotrema rostrata* (Shaw and Nodder, 1794), from Moreton Bay, Queensland, Australia. *Mar. Freshwater Res.* **53**, 679-686.

Lai, N. C., Graham, J. B. and Burnett, L. (1990). Blood respiratory properties and the effect of swimming on blood gas transport in the leopard shark (*Triakis semifasciata*). *J. Exp. Biol.* **151**, 161-173.

Mandic, M., Todgham, A. E. and Richards, J. G. (2009). Mechanisms and evolution of hypoxia tolerance in fish. *Proc. Biol. Sci.* **276**, 735-744.

McKenzie, D. J., Piraccini, G., Piccolella, M., Steffensen, J. F., Bolis, C. L. and Taylor, E. W. (2000). Effects of dietary fatty acid composition on metabolic rate and responses to hypoxia in the European eel (*Anguilla anguilla*). *Fish Physiol. Biochem.* **22**, 281-296.

McMurray, C. H., Blanchflower, W. J. and Rice, D. A. (1984). Automated kinetic method for D-3-hydroxybutyrate in plasma or serum. *Clin. Chem.* **30**, 421-425.

Nilsson, G. E. and Östlund-Nilsson, S. (2008). Does size matter for hypoxia tolerance in fish? *Biol. Rev.* **83**, 173-189.

Nilsson, G. E. and Renshaw, G. M. (2004). Hypoxic survival strategies in two fishes: extreme anoxia tolerance in the North European crucian carp and natural hypoxic preconditioning in a coral-reef shark. *J. Exp. Biol.* **207**, 3131-3139.

Nonnotte, G., Maxime, V., Truchot, J. P., Williot, P. and Peyraud, C. (1993). Respiratory responses to progressive ambient hypoxia in the sturgeon, *Acipenser baeri*. *Respir. Physiol.* **91**, 71-82.

Perry, S. F. and Gilmour, K. M. (1996). Consequences of catecholamine release on ventilation and blood oxygen transport during hypoxia and hypercapnia in an elasmobranch *Squalus acanthias* and a teleost *Oncorhynchus mykiss*. *J. Exp. Biol.* **199**, 2105-2118.

Perry, S. F. and Reid, S. D. (1992). Relationship between blood  $O_2$  content and catecholamine levels during hypoxia in rainbow trout and American eel. *Am. J. Physiol.* **263**, R240-R249.

Pörtner, H. O. and Grieshaber, M. K. (1993). Critical  $P_{O_2}(s)$  in oxyconforming and oxyregulating animals: gas exchange, metabolic rate and the mode of energy

- production. In *The Vertebrate Gas Transport Cascade: Adaptations to Environment and Mode of Life* (ed. J. Eduardo and P. W. Bicudo), pp. 330-357. Boca Raton: CRC Press.
- Renshaw, G. M. C., Kerrisk, C. B. and Nilsson, G. E.** (2002). The role of adenosine in the anoxic survival of the epaulette shark, *Hemiscyllium ocellatum*. *Comp. Biochem. Physiol.* **131B**, 133-141.
- Routley, M. H., Nilsson, G. E. and Renshaw, G. M. C.** (2002). Exposure to hypoxia primes the respiratory and metabolic responses of the epaulette shark to progressive hypoxia. *Comp. Biochem. Physiol.* **131A**, 313-321.
- Scott, G. R., Wood, C. M., Sloman, K. A., Iftikar, F. I., De Boeck, G., Almeida-Val, V. M. and Val, A. L.** (2008). Respiratory responses to progressive hypoxia in the Amazonian oscar, *Astronotus ocellatus*. *Respir. Physiol. Neurobiol.* **162**, 109-116.
- Short, S., Taylor, E. W. and Butler, P. J.** (1979). The effectiveness of oxygen transfer during normoxia and hypoxia in the dogfish (*Scyliorhinus canicula* L.) before and after cardiac vagotomy. *J. Comp. Physiol.* **132B**, 289-295.
- Sollid, J., Weber, R. E. and Nilsson, G. E.** (2005). Temperature alters the respiratory surface area of crucian carp *Carassius carassius* and goldfish *Carassius auratus*. *J. Exp. Biol.* **208**, 1109-1116.
- Speers-Roesch, B. and Treberg, J. R.** (2010). The unusual energy metabolism of elasmobranch fishes. *Comp. Biochem. Physiol.* **155A**, 417-434.
- Speers-Roesch, B., Sandblom, E., Lau, G. Y., Farrell, A. P. and Richards, J. G.** (2010). Effects of environmental hypoxia on cardiac energy metabolism and performance in tilapia. *Am. J. Physiol.* **298**, R104-R119.
- Speers-Roesch, B., Brauner, C. J., Farrell, A. P., Hickey, A. J. R., Renshaw, G. M. C., Wang, Y. S. and Richards, J. G.** (2012). Hypoxia tolerance in elasmobranchs. II. Cardiovascular function and tissue metabolic responses during progressive and relative hypoxia exposures. *J. Exp. Biol.* **215**, 103-114.
- Thuy, N. H., Tien, L. A., Tuyet, P. N., Huong, D. T. T., Cong, N. V., Bayley, M., Wang, T. and Lefevre, S.** (2010). Critical oxygen tension increases during digestion in the perch *Perca fluviatilis*. *J. Fish Biol.* **76**, 1025-1031.
- Tucker, V. A.** (1967). A method for oxygen content and dissociation curves on microliter blood samples. *J. Appl. Physiol.* **23**, 407-410.
- Van Raaij, M. T. M., Vianen, G. J. and Van den Thillart, G. E. E. J. M.** (1996). Blood gas parameters and the responses of erythrocytes in carp exposed to deep hypoxia and subsequent recovery. *J. Comp. Physiol.* **166B**, 453-460.
- Wells, R. M. G.** (2005). Blood-gas transport and hemoglobin function in polar fishes: Does low temperature explain physiological characters? In *Physiology of Polar Fishes* (ed. A. P. Farrell and J. F. Steffensen), pp. 281-316. San Diego: Elsevier Academic Press.
- Yeager, D. P. and Ultsch, G. R.** (1989). Physiological regulation and conformation: a BASIC program for the determination of critical points. *Physiol. Zool.* **62**, 888-907.
